# Supplementary material for: E-cigarette initiation and associated changes in smoking cessation and reduction: the Population Assessment of Tobacco and Health Study, 2013–2015
Source: PubMed Central journal article supplement — Tob Control. 2018 Mar 24;28(1):42–9. doi: 10.1136/tobaccocontrol-2017-054108 (PMC6317439; doi:10.1136/tobaccocontrol-2017-054108), 2018-03-24
Supplement: tobaccocontrol-2017-054108supp001.pdf [file tobaccocontrol-2017-054108supp001.pdf]

## Supplementary Material

### TABLES

|                                                                                                                                      |    |
|--------------------------------------------------------------------------------------------------------------------------------------|----|
| <b>Table S1.</b> Logistic regression: 30 day cigarette cessation at Wave 2 as a function of e-cigarette use versus non-use.....      | 2  |
| <b>Table S2.</b> Logistic regression: 90 day cigarette cessation at Wave 2.....                                                      | 4  |
| <b>Table S3.</b> Logistic regression: 30-day cigarette cessation among smokers reporting a quit attempt in year prior to Wave 1..... | 6  |
| <b>Table S4.</b> Logistic regression: 30 day cigarette cessation at Wave 2 by current and recent e-cigarette use.....                | 8  |
| <b>Table S5.</b> Logistic regression: 30-day cigarette cessation at Wave 2 by e-cigarette cartridge use and frequency of use.....    | 10 |
| <b>Table S6.</b> Logistic regression: 30-day cigarette cessation at Wave 2 by refillable e-cigarette use and frequency of use.....   | 12 |
| <b>Table S7.</b> Logistic regression: 30-day cigarette cessation at Wave 2 by e-cigarette tank use and frequency of use.....         | 14 |
| <b>Table S8.</b> Linear regression: E-cigarette initiation and change in smoking intensity between Wave 1 and Wave 2.....            | 16 |

**Table S1. Logistic regression: 30 day cigarette cessation at Wave 2 as a function of e-cigarette use versus non-use, PATH (2013-2015) (n=5,124)**

|                                         | 30-day cigarette cessation at Wave 2 |              |         |
|-----------------------------------------|--------------------------------------|--------------|---------|
|                                         | Adjusted OR                          | 95% CI       | p-value |
| Sex                                     |                                      |              |         |
| Male                                    | Ref                                  | -            | -       |
| Female                                  | 1.11                                 | (0.90, 1.38) | 0.311   |
| Age                                     |                                      |              |         |
| 25 to 34 years                          | Ref                                  | -            | -       |
| 35 to 44 years                          | 0.95                                 | (0.68, 1.34) | 0.783   |
| 45 to 54 years                          | 0.92                                 | (0.60, 1.40) | 0.684   |
| 55 to 64 years                          | 1.03                                 | (0.67, 1.57) | 0.898   |
| 65 to 74 years                          | 1.24                                 | (0.70, 2.20) | 0.464   |
| ≥ 75 years                              | 1.74                                 | (0.63, 4.83) | 0.285   |
| Race/Ethnicity                          |                                      |              |         |
| Non-Hispanic White                      | Ref                                  | -            | -       |
| Non-Hispanic Black                      | 0.60                                 | (0.40, 0.89) | 0.013   |
| Hispanic                                | 0.82                                 | (0.57, 1.19) | 0.292   |
| Non-Hispanic Other                      | 1.08                                 | (0.61, 1.90) | 0.794   |
| Region                                  |                                      |              |         |
| Northeast                               | Ref                                  | -            | -       |
| Midwest                                 | 1.04                                 | (0.68, 1.58) | 0.866   |
| South                                   | 1.35                                 | (0.94, 1.95) | 0.105   |
| West                                    | 1.07                                 | (0.71, 1.60) | 0.759   |
| Household Income                        |                                      |              |         |
| Below poverty level                     | Ref                                  | -            | -       |
| At or near poverty level                | 1.16                                 | (0.82, 1.63) | 0.392   |
| ≥ twice poverty level                   | 1.36                                 | (0.96, 1.93) | 0.084   |
| Education                               |                                      |              |         |
| Less than high school                   | Ref                                  | -            | -       |
| High school or equivalent               | 0.93                                 | (0.60, 1.43) | 0.730   |
| Some college                            | 0.99                                 | (0.66, 1.47) | 0.951   |
| Bachelor's/advanced degree              | 0.90                                 | (0.52, 1.56) | 0.711   |
| Lived in a smoking household as a child |                                      |              |         |
| No                                      | Ref                                  | -            | -       |
| Yes                                     | 0.82                                 | (0.59, 1.15) | 0.251   |
| Currently lives with a cigarette smoker |                                      |              |         |
| No                                      | Ref                                  | -            | -       |
| Yes                                     | 0.97                                 | (0.72, 1.30) | 0.828   |

|                                                          |      |              |        |
|----------------------------------------------------------|------|--------------|--------|
| Frequency of cigarette use at Wave 1                     |      |              |        |
| Some day cigarette smoker                                | Ref  | -            | -      |
| Every day cigarette smoker                               | 0.29 | (0.20, 0.40) | <0.001 |
| Intensity of cigarette smoking at Wave 1                 |      |              |        |
| <1 pack per day                                          | Ref  | -            | -      |
| 1-2 packs per day                                        | 0.87 | (0.61, 1.24) | 0.436  |
| ≥ 2 packs per day                                        | 0.78 | (0.28, 2.15) | 0.632  |
| Time to first cigarette in morning                       |      |              |        |
| ≤ 5 minutes                                              | Ref  | -            | -      |
| 5-30 minutes                                             | 1.28 | (0.87, 1.88) | 0.212  |
| 30-60 minutes                                            | 1.94 | (0.80, 4.69) | 0.142  |
| > 60 minutes                                             | 1.83 | (1.20, 2.79) | 0.005  |
| Tried to quit smoking cigarettes in year prior to Wave 1 |      |              |        |
| No                                                       | Ref  | -            | -      |
| Yes                                                      | 1.24 | (0.99, 1.54) | 0.059  |
| New e-cigarette use at Wave 2                            |      |              |        |
| Non-user                                                 | Ref  | -            | -      |
| E-cigarette user                                         | 1.46 | (0.95, 2.23) | 0.081  |

---

**Table S2. Logistic regression: 90 day cigarette cessation at Wave 2, PATH (2013-2015)**  
(n=5,124)

|                                                | 90-day cigarette cessation at Wave 2 |              |         |
|------------------------------------------------|--------------------------------------|--------------|---------|
|                                                | Adjusted OR                          | 95% CI       | p-value |
| <b>Sex</b>                                     |                                      |              |         |
| Male                                           | Ref                                  | -            | -       |
| Female                                         | 1.15                                 | (0.92, 1.44) | 0.225   |
| <b>Age</b>                                     |                                      |              |         |
| 25 to 34 years                                 | Ref                                  | -            | -       |
| 35 to 44 years                                 | 0.97                                 | (0.67, 1.40) | 0.867   |
| 45 to 54 years                                 | 0.93                                 | (0.60, 1.45) | 0.757   |
| 55 to 64 years                                 | 1.08                                 | (0.69, 1.69) | 0.734   |
| 65 to 74 years                                 | 1.34                                 | (0.70, 2.56) | 0.373   |
| ≥ 75 years                                     | 1.16                                 | (0.36, 3.77) | 0.803   |
| <b>Race/Ethnicity</b>                          |                                      |              |         |
| Non-Hispanic White                             | Ref                                  | -            | -       |
| Non-Hispanic Black                             | 0.59                                 | (0.38, 0.92) | 0.020   |
| Hispanic                                       | 0.84                                 | (0.57, 1.25) | 0.385   |
| Non-Hispanic Other                             | 1.05                                 | (0.53, 2.08) | 0.883   |
| <b>Region</b>                                  |                                      |              |         |
| Northeast                                      | Ref                                  | -            | -       |
| Midwest                                        | 0.93                                 | (0.56, 1.55) | 0.769   |
| South                                          | 1.25                                 | (0.83, 1.88) | 0.282   |
| West                                           | 0.98                                 | (0.61, 1.57) | 0.921   |
| <b>Household Income</b>                        |                                      |              |         |
| Below poverty level                            | Ref                                  | -            | -       |
| At or near poverty level                       | 1.06                                 | (0.73, 1.52) | 0.770   |
| ≥ twice poverty level                          | 1.16                                 | (0.79, 1.68) | 0.445   |
| <b>Education</b>                               |                                      |              |         |
| Less than high school                          | Ref                                  | -            | -       |
| High school or equivalent                      | 0.87                                 | (0.56, 1.33) | 0.508   |
| Some college                                   | 0.96                                 | (0.64, 1.42) | 0.827   |
| Bachelor's/advanced degree                     | 0.82                                 | (0.46, 1.48) | 0.508   |
| <b>Lived in a smoking household as a child</b> |                                      |              |         |
| No                                             | Ref                                  | -            | -       |
| Yes                                            | 0.90                                 | (0.63, 1.28) | 0.542   |
| <b>Currently lives with a cigarette smoker</b> |                                      |              |         |
| No                                             | Ref                                  | -            | -       |
| Yes                                            | 0.95                                 | (0.70, 1.27) | 0.714   |

|                                                          |      |               |        |
|----------------------------------------------------------|------|---------------|--------|
| Frequency of cigarette use at Wave 1                     |      |               |        |
| Some day cigarette smoker                                | Ref  | -             | -      |
| Every day cigarette smoker                               | 0.25 | (0.18, 0.37)  | <0.001 |
| Intensity of cigarette smoking at Wave 1                 |      |               |        |
| <1 pack per day                                          | Ref  | -             | -      |
| 1-2 packs per day                                        | 0.84 | (0.57, 1.24)  | 0.377  |
| ≥ 2 packs per day                                        | 0.75 | (0.24, 2.36)  | 0.621  |
| Time to first cigarette in morning                       |      |               |        |
| ≤ 5 minutes                                              | Ref  | -             | -      |
| 5-30 minutes                                             | 1.24 | (0.80, 1.92)  | 0.335  |
| 30-60 minutes                                            | 1.63 | (0.54, 4.96)  | 0.384  |
| > 60 minutes                                             | 1.87 | (1.15, 3.02)  | 0.012  |
| Tried to quit smoking cigarettes in year prior to Wave 1 |      |               |        |
| No                                                       | Ref  | -             | -      |
| Yes                                                      | 1.25 | (0.99, 1.59)  | 0.060  |
| New e-cigarette use at Wave 2                            |      |               |        |
| Non-user                                                 | Ref  | -             | -      |
| Experimenter                                             | 0.45 | (0.21, 0.98)  | 0.045  |
| Some day user                                            | 0.41 | (0.12, 1.41)  | 0.155  |
| Every day user                                           | 6.87 | (3.86, 12.23) | <0.001 |

---

**Table S3. Logistic regression: 30-day cigarette cessation among smokers reporting a quit attempt in year prior to Wave 1, PATH (2013-2015) (n=2,337)**

|                                         | 30-day cigarette cessation at Wave 2 |              |         |
|-----------------------------------------|--------------------------------------|--------------|---------|
|                                         | Adjusted OR                          | 95% CI       | p-value |
| Sex                                     |                                      |              |         |
| Male                                    | Ref                                  | -            | -       |
| Female                                  | 1.24                                 | (0.88, 1.74) | 0.212   |
| Age                                     |                                      |              |         |
| 25 to 34 years                          | Ref                                  | -            | -       |
| 35 to 44 years                          | 0.97                                 | (0.62, 1.52) | 0.894   |
| 45 to 54 years                          | 1.00                                 | (0.59, 1.68) | 0.996   |
| 55 to 64 years                          | 1.17                                 | (0.65, 2.12) | 0.600   |
| 65 to 74 years                          | 1.14                                 | (0.52, 2.50) | 0.740   |
| ≥ 75 years                              | 0.39                                 | (0.03, 5.40) | 0.481   |
| Race/Ethnicity                          |                                      |              |         |
| Non-Hispanic White                      | Ref                                  | -            | -       |
| Non-Hispanic Black                      | 0.57                                 | (0.32, 1.02) | 0.058   |
| Hispanic                                | 0.81                                 | (0.47, 1.40) | 0.446   |
| Non-Hispanic Other                      | 0.94                                 | (0.38, 2.31) | 0.885   |
| Region                                  |                                      |              |         |
| Northeast                               | Ref                                  | -            | -       |
| Midwest                                 | 0.77                                 | (0.40, 1.48) | 0.437   |
| South                                   | 1.33                                 | (0.82, 2.16) | 0.246   |
| West                                    | 0.89                                 | (0.51, 1.55) | 0.676   |
| Household Income                        |                                      |              |         |
| Below poverty level                     | Ref                                  | -            | -       |
| At or near poverty level                | 0.82                                 | (0.49, 1.36) | 0.430   |
| ≥ twice poverty level                   | 0.91                                 | (0.56, 1.47) | 0.704   |
| Education                               |                                      |              |         |
| Less than high school                   | Ref                                  | -            | -       |
| High school or equivalent               | 0.86                                 | (0.49, 1.51) | 0.594   |
| Some college                            | 1.14                                 | (0.66, 1.97) | 0.634   |
| Bachelor's/advanced degree              | 0.77                                 | (0.38, 1.57) | 0.475   |
| Lived in a smoking household as a child |                                      |              |         |
| No                                      | Ref                                  | -            | -       |
| Yes                                     | 1.07                                 | (0.71, 1.64) | 0.735   |
| Currently lives with a cigarette smoker |                                      |              |         |
| No                                      | Ref                                  | -            | -       |
| Yes                                     | 0.93                                 | (0.63, 1.36) | 0.694   |
| Frequency of cigarette use at Wave 1    |                                      |              |         |
| Some day cigarette smoker               | Ref                                  | -            | -       |

|                                          |      |              |        |
|------------------------------------------|------|--------------|--------|
| Every day cigarette smoker               | 0.34 | (0.22, 0.52) | <0.001 |
| Intensity of cigarette smoking at Wave 1 |      |              |        |
| <1 pack per day                          | Ref  | -            | -      |
| 1-2 packs per day                        | 0.68 | (0.38, 1.24) | 0.207  |
| ≥ 2 packs per day                        | 0.59 | (0.08, 4.43) | 0.603  |
| Time to first cigarette in morning       |      |              |        |
| ≤ 5 minutes                              | Ref  | -            | -      |
| 5-30 minutes                             | 1.16 | (0.62, 2.17) | 0.634  |
| 30-60 minutes                            | 1.73 | (0.40, 7.45) | 0.461  |
| > 60 minutes                             | 1.97 | (1.09, 3.57) | 0.025  |
| New e-cigarette use at Wave 2            |      |              |        |
| Non-user                                 | Ref  | -            | -      |
| Experimenter                             | 0.73 | (0.33, 1.63) | 0.442  |
| Some day user                            | 0.64 | (0.17, 2.37) | 0.504  |
| Every day user                           | 3.46 | (1.43, 8.37) | 0.006  |

---

**Table S4. Logistic regression: 30 day cigarette cessation at Wave 2 by current and recent e-cigarette use, PATH (2013-2015) (n=5,124)**

|                                                | 30-day cigarette cessation at Wave 2 |              |         |
|------------------------------------------------|--------------------------------------|--------------|---------|
|                                                | Adjusted OR                          | 95% CI       | p-value |
| <b>Sex</b>                                     |                                      |              |         |
| Male                                           | Ref                                  | -            | -       |
| Female                                         | 1.14                                 | (0.91, 1.41) | 0.246   |
| <b>Age</b>                                     |                                      |              |         |
| 25 to 34 years                                 | Ref                                  | -            | -       |
| 35 to 44 years                                 | 0.92                                 | (0.64, 1.30) | 0.622   |
| 45 to 54 years                                 | 0.93                                 | (0.61, 1.41) | 0.726   |
| 55 to 64 years                                 | 1.06                                 | (0.69, 1.63) | 0.785   |
| 65 to 74 years                                 | 1.28                                 | (0.70, 2.34) | 0.419   |
| ≥ 75 years                                     | 1.61                                 | (0.59, 4.43) | 0.351   |
| <b>Race/Ethnicity</b>                          |                                      |              |         |
| Non-Hispanic White                             | Ref                                  | -            | -       |
| Non-Hispanic Black                             | 0.60                                 | (0.40, 0.90) | 0.014   |
| Hispanic                                       | 0.82                                 | (0.56, 1.20) | 0.298   |
| Non-Hispanic Other                             | 1.06                                 | (0.59, 1.91) | 0.833   |
| <b>Region</b>                                  |                                      |              |         |
| Northeast                                      | Ref                                  | -            | -       |
| Midwest                                        | 1.04                                 | (0.68, 1.60) | 0.860   |
| South                                          | 1.36                                 | (0.95, 1.96) | 0.094   |
| West                                           | 1.06                                 | (0.71, 1.60) | 0.764   |
| <b>Household Income</b>                        |                                      |              |         |
| Below poverty level                            | Ref                                  | -            | -       |
| At or near poverty level                       | 1.12                                 | (0.79, 1.58) | 0.516   |
| ≥ twice poverty level                          | 1.31                                 | (0.92, 1.87) | 0.130   |
| <b>Education</b>                               |                                      |              |         |
| Less than high school                          | Ref                                  | -            | -       |
| High school or equivalent                      | 0.90                                 | (0.59, 1.39) | 0.635   |
| Some college                                   | 1.00                                 | (0.67, 1.50) | 0.985   |
| Bachelor's/advanced degree                     | 0.92                                 | (0.53, 1.58) | 0.753   |
| <b>Lived in a smoking household as a child</b> |                                      |              |         |
| No                                             | Ref                                  | -            | -       |
| Yes                                            | 0.81                                 | (0.57, 1.14) | 0.227   |
| <b>Currently lives with a cigarette smoker</b> |                                      |              |         |
| No                                             | Ref                                  | -            | -       |
| Yes                                            | 0.98                                 | (0.73, 1.32) | 0.915   |



|                                                          |      |               |        |
|----------------------------------------------------------|------|---------------|--------|
| Frequency of cigarette use at Wave 1                     |      |               |        |
| Some day cigarette smoker                                | Ref  | -             | -      |
| Every day cigarette smoker                               | 0.27 | (0.19, 0.38)  | <0.001 |
| Intensity of cigarette smoking at Wave 1                 |      |               |        |
| <1 pack per day                                          | Ref  | -             | -      |
| 1-2 packs per day                                        | 0.88 | (0.62, 1.26)  | 0.489  |
| ≥ 2 packs per day                                        | 0.85 | (0.30, 2.38)  | 0.758  |
| Time to first cigarette in morning                       |      |               |        |
| ≤ 5 minutes                                              | Ref  | -             | -      |
| 5-30 minutes                                             | 1.28 | (0.86, 1.91)  | 0.226  |
| 30-60 minutes                                            | 1.88 | (0.69, 5.12)  | 0.217  |
| > 60 minutes                                             | 1.88 | (1.21, 2.92)  | 0.005  |
| Tried to quit smoking cigarettes in year prior to Wave 1 |      |               |        |
| No                                                       | Ref  | -             | -      |
| Yes                                                      | 1.26 | (1.01, 1.57)  | 0.042  |
| New e-cigarette use between Waves or at Wave 2           |      |               |        |
| No e-cigarette use at W2 or in last year                 | Ref  | -             | -      |
| E-cigarette use in last year but not at W2               | 0.87 | (0.61, 1.22)  | 0.414  |
| Experimental e-cigarette use at W2                       | 0.49 | (0.24, 0.97)  | 0.041  |
| Some day e-cigarette use at W2                           | 0.48 | (0.17, 1.40)  | 0.178  |
| Every day e-cigarette use at W2                          | 7.52 | (4.18, 13.54) | <0.001 |

**Table S5. Logistic regression: 30-day cigarette cessation at Wave 2 by e-cigarette cartridge use and frequency of use, PATH (2013-2015) (n=5,020)**

|                                         | 30-day cigarette cessation at Wave 2 |              |         |
|-----------------------------------------|--------------------------------------|--------------|---------|
|                                         | Adjusted OR                          | 95% CI       | p-value |
| Sex                                     |                                      |              |         |
| Male                                    | Ref                                  | -            | -       |
| Female                                  | 1.16                                 | (0.93, 1.45) | 0.178   |
| Age                                     |                                      |              |         |
| 25 to 34 years                          | Ref                                  | -            | -       |
| 35 to 44 years                          | 0.92                                 | (0.65, 1.31) | 0.651   |
| 45 to 54 years                          | 0.94                                 | (0.61, 1.43) | 0.765   |
| 55 to 64 years                          | 1.12                                 | (0.72, 1.74) | 0.599   |
| 65 to 74 years                          | 1.32                                 | (0.73, 2.38) | 0.356   |
| ≥ 75 years                              | 1.63                                 | (0.62, 4.33) | 0.319   |
| Race/Ethnicity                          |                                      |              |         |
| Non-Hispanic White                      | Ref                                  | -            | -       |
| Non-Hispanic Black                      | 0.62                                 | (0.41, 0.94) | 0.026   |
| Hispanic                                | 0.88                                 | (0.60, 1.29) | 0.500   |
| Non-Hispanic Other                      | 1.11                                 | (0.62, 1.99) | 0.720   |
| Region                                  |                                      |              |         |
| Northeast                               | Ref                                  | -            | -       |
| Midwest                                 | 1.04                                 | (0.68, 1.59) | 0.860   |
| South                                   | 1.31                                 | (0.91, 1.88) | 0.146   |
| West                                    | 1.02                                 | (0.68, 1.53) | 0.910   |
| Household Income                        |                                      |              |         |
| Below poverty level                     | Ref                                  | -            | -       |
| At or near poverty level                | 1.09                                 | (0.77, 1.54) | 0.630   |
| ≥ twice poverty level                   | 1.28                                 | (0.90, 1.81) | 0.164   |
| Education                               |                                      |              |         |
| Less than high school                   | Ref                                  | -            | -       |
| High school or equivalent               | 0.90                                 | (0.58, 1.40) | 0.642   |
| Some college                            | 0.99                                 | (0.66, 1.49) | 0.961   |
| Bachelor's/advanced degree              | 0.93                                 | (0.54, 1.63) | 0.809   |
| Lived in a smoking household as a child |                                      |              |         |
| No                                      | Ref                                  | -            | -       |
| Yes                                     | 0.83                                 | (0.59, 1.19) | 0.310   |
| Currently lives with a cigarette smoker |                                      |              |         |
| No                                      | Ref                                  | -            | -       |
| Yes                                     | 0.94                                 | (0.69, 1.28) | 0.690   |
| Frequency of cigarette use at Wave 1    |                                      |              |         |

|                                                          |       |               |        |
|----------------------------------------------------------|-------|---------------|--------|
| Some day cigarette smoker                                | Ref   | -             | -      |
| Every day cigarette smoker                               | 0.27  | (0.19, 0.38)  | <0.001 |
| Intensity of cigarette smoking at Wave 1                 |       |               |        |
| <1 pack per day                                          | Ref   | -             | -      |
| 1-2 packs per day                                        | 0.91  | (0.63, 1.31)  | 0.605  |
| ≥ 2 packs per day                                        | 0.94  | (0.33, 2.67)  | 0.914  |
| Time to first cigarette in morning                       |       |               |        |
| ≤ 5 minutes                                              | Ref   | -             | -      |
| 5-30 minutes                                             | 1.27  | (0.85, 1.89)  | 0.242  |
| 30-60 minutes                                            | 1.82  | (0.66, 5.04)  | 0.246  |
| > 60 minutes                                             | 1.86  | (1.20, 2.88)  | 0.006  |
| Tried to quit smoking cigarettes in year prior to Wave 1 |       |               |        |
| No                                                       | Ref   | -             | -      |
| Yes                                                      | 1.25  | (1.00, 1.57)  | 0.052  |
| Type and frequency of e-cigarette use at Wave 2          |       |               |        |
| No e-cigarette use                                       | Ref   | -             | -      |
| Experimental/some day use of non-cartridge e-cig         | 0.78  | (0.36, 1.72)  | 0.538  |
| Experimental/some day use of cartridge e-cig             | 0.30  | (0.10, 0.88)  | 0.029  |
| Every day use of non-cartridge e-cig                     | 10.14 | (5.37, 19.12) | <0.001 |
| Every day use of cartridge e-cig                         | 2.36  | (0.43, 12.98) | 0.318  |

**Table S6. Logistic regression: 30-day cigarette cessation at Wave 2 by refillable e-cigarette use and frequency of use, PATH (2013-2015) (n=5,122)**

|                                                | 30-day cigarette cessation at Wave 2 |              |         |
|------------------------------------------------|--------------------------------------|--------------|---------|
|                                                | Adjusted OR                          | 95% CI       | p-value |
| <b>Sex</b>                                     |                                      |              |         |
| Male                                           | Ref                                  | -            | -       |
| Female                                         | 1.15                                 | (0.92, 1.43) | 0.223   |
| <b>Age</b>                                     |                                      |              |         |
| 25 to 34 years                                 | Ref                                  | -            | -       |
| 35 to 44 years                                 | 0.92                                 | (0.65, 1.31) | 0.647   |
| 45 to 54 years                                 | 0.96                                 | (0.63, 1.46) | 0.855   |
| 55 to 64 years                                 | 1.11                                 | (0.72, 1.72) | 0.627   |
| 65 to 74 years                                 | 1.33                                 | (0.74, 2.39) | 0.345   |
| ≥ 75 years                                     | 1.66                                 | (0.63, 4.40) | 0.304   |
| <b>Race/Ethnicity</b>                          |                                      |              |         |
| Non-Hispanic White                             | Ref                                  | -            | -       |
| Non-Hispanic Black                             | 0.62                                 | (0.42, 0.93) | 0.021   |
| Hispanic                                       | 0.84                                 | (0.58, 1.23) | 0.373   |
| Non-Hispanic Other                             | 1.07                                 | (0.60, 1.93) | 0.812   |
| <b>Region</b>                                  |                                      |              |         |
| Northeast                                      | Ref                                  | -            | -       |
| Midwest                                        | 1.02                                 | (0.67, 1.57) | 0.914   |
| South                                          | 1.33                                 | (0.92, 1.92) | 0.124   |
| West                                           | 1.04                                 | (0.69, 1.56) | 0.856   |
| <b>Household Income</b>                        |                                      |              |         |
| Below poverty level                            | Ref                                  | -            | -       |
| At or near poverty level                       | 1.12                                 | (0.79, 1.58) | 0.519   |
| ≥ twice poverty level                          | 1.30                                 | (0.91, 1.84) | 0.145   |
| <b>Education</b>                               |                                      |              |         |
| Less than high school                          | Ref                                  | -            | -       |
| High school or equivalent                      | 0.90                                 | (0.58, 1.39) | 0.626   |
| Some college                                   | 0.99                                 | (0.66, 1.50) | 0.974   |
| Bachelor's/advanced degree                     | 0.91                                 | (0.53, 1.57) | 0.738   |
| <b>Lived in a smoking household as a child</b> |                                      |              |         |
| No                                             | Ref                                  | -            | -       |
| Yes                                            | 0.81                                 | (0.58, 1.15) | 0.236   |
| <b>Currently lives with a cigarette smoker</b> |                                      |              |         |
| No                                             | Ref                                  | -            | -       |
| Yes                                            | 0.96                                 | (0.71, 1.31) | 0.813   |
| <b>Frequency of cigarette use at Wave 1</b>    |                                      |              |         |

|                                                          |      |               |        |
|----------------------------------------------------------|------|---------------|--------|
| Some day cigarette smoker                                | Ref  | -             | -      |
| Every day cigarette smoker                               | 0.27 | (0.19, 0.38)  | <0.001 |
| Intensity of cigarette smoking at Wave 1                 |      |               |        |
| <1 pack per day                                          | Ref  | -             | -      |
| 1-2 packs per day                                        | 0.88 | (0.61, 1.26)  | 0.482  |
| ≥ 2 packs per day                                        | 0.85 | (0.31, 2.36)  | 0.754  |
| Time to first cigarette in morning                       |      |               |        |
| ≤ 5 minutes                                              | Ref  | -             | -      |
| 5-30 minutes                                             | 1.26 | (0.85, 1.87)  | 0.247  |
| 30-60 minutes                                            | 1.81 | (0.66, 4.97)  | 0.244  |
| > 60 minutes                                             | 1.85 | (1.20, 2.87)  | 0.006  |
| Tried to quit smoking cigarettes in year prior to Wave 1 |      |               |        |
| No                                                       | Ref  | -             | -      |
| Yes                                                      | 1.26 | (1.00, 1.58)  | 0.045  |
| Type and frequency of e-cigarette use at Wave 2          |      |               |        |
| No e-cigarette use                                       | Ref  | -             | -      |
| Experimental/some day use of non-refillable e-cig        | 0.25 | (0.07, 0.92)  | 0.037  |
| Experimental/some day use of refillable e-cig            | 0.72 | (0.35, 1.45)  | 0.351  |
| Every day use of non-refillable e-cig                    | 3.31 | (0.61, 17.85) | 0.162  |
| Every day use of refillable e-cig                        | 9.13 | (4.90, 17.02) | <0.001 |

**Table S7. Logistic regression: 30-day cigarette cessation at Wave 2 by e-cigarette tank use and frequency of use, PATH (2013-2015) (n=5,118)**

|                                         | 30-day cigarette cessation at Wave 2 |              |         |
|-----------------------------------------|--------------------------------------|--------------|---------|
|                                         | Adjusted OR                          | 95% CI       | p-value |
| Sex                                     |                                      |              |         |
| Male                                    | Ref                                  | -            | -       |
| Female                                  | 1.15                                 | (0.93, 1.43) | 0.201   |
| Age                                     |                                      |              |         |
| 25 to 34 years                          | Ref                                  | -            | -       |
| 35 to 44 years                          | 0.92                                 | (0.65, 1.32) | 0.660   |
| 45 to 54 years                          | 0.96                                 | (0.63, 1.46) | 0.849   |
| 55 to 64 years                          | 1.12                                 | (0.72, 1.73) | 0.609   |
| 65 to 74 years                          | 1.28                                 | (0.71, 2.33) | 0.407   |
| ≥ 75 years                              | 1.65                                 | (0.63, 4.36) | 0.306   |
| Race/Ethnicity                          |                                      |              |         |
| Non-Hispanic White                      | Ref                                  | -            | -       |
| Non-Hispanic Black                      | 0.63                                 | (0.42, 0.94) | 0.025   |
| Hispanic                                | 0.86                                 | (0.59, 1.25) | 0.422   |
| Non-Hispanic Other                      | 1.09                                 | (0.61, 1.96) | 0.775   |
| Region                                  |                                      |              |         |
| Northeast                               | Ref                                  | -            | -       |
| Midwest                                 | 1.04                                 | (0.68, 1.59) | 0.858   |
| South                                   | 1.34                                 | (0.93, 1.93) | 0.116   |
| West                                    | 1.05                                 | (0.69, 1.57) | 0.829   |
| Household Income                        |                                      |              |         |
| Below poverty level                     | Ref                                  | -            | -       |
| At or near poverty level                | 1.11                                 | (0.78, 1.57) | 0.560   |
| ≥ twice poverty level                   | 1.30                                 | (0.92, 1.85) | 0.135   |
| Education                               |                                      |              |         |
| Less than high school                   | Ref                                  | -            | -       |
| High school or equivalent               | 0.91                                 | (0.59, 1.41) | 0.665   |
| Some college                            | 0.99                                 | (0.66, 1.50) | 0.974   |
| Bachelor's/advanced degree              | 0.92                                 | (0.53, 1.60) | 0.768   |
| Lived in a smoking household as a child |                                      |              |         |
| No                                      | Ref                                  | -            | -       |
| Yes                                     | 0.81                                 | (0.57, 1.14) | 0.224   |
| Currently lives with a cigarette smoker |                                      |              |         |
| No                                      | Ref                                  | -            | -       |
| Yes                                     | 0.96                                 | (0.71, 1.30) | 0.789   |
| Frequency of cigarette use at Wave 1    |                                      |              |         |

|                                                          |       |               |        |
|----------------------------------------------------------|-------|---------------|--------|
| Some day cigarette smoker                                | Ref   | -             | -      |
| Every day cigarette smoker                               | 0.27  | (0.19, 0.37)  | <0.001 |
| Intensity of cigarette smoking at Wave 1                 |       |               |        |
| <1 pack per day                                          | Ref   | -             | -      |
| 1-2 packs per day                                        | 0.88  | (0.61, 1.27)  | 0.501  |
| ≥ 2 packs per day                                        | 0.90  | (0.32, 2.53)  | 0.840  |
| Time to first cigarette in morning                       |       |               |        |
| ≤ 5 minutes                                              | Ref   | -             | -      |
| 5-30 minutes                                             | 1.24  | (0.84, 1.85)  | 0.277  |
| 30-60 minutes                                            | 1.79  | (0.66, 4.91)  | 0.252  |
| > 60 minutes                                             | 1.82  | (1.18, 2.81)  | 0.007  |
| Tried to quit smoking cigarettes in year prior to Wave 1 |       |               |        |
| No                                                       | Ref   | -             | -      |
| Yes                                                      | 1.26  | (1.00, 1.58)  | 0.047  |
| Type and frequency of e-cigarette use at Wave 2          |       |               |        |
| No e-cigarette use                                       | Ref   | -             | -      |
| Experimental/some day use of non-tank e-cig              | 0.34  | (0.14, 0.83)  | 0.019  |
| Experimental/some day use of tank e-cig                  | 0.77  | (0.33, 1.79)  | 0.544  |
| Every day use of non-tank e-cig                          | 3.56  | (1.04, 12.20) | 0.043  |
| Every day use of tank e-cig                              | 10.24 | (5.42, 19.37) | <0.001 |

**Table S8. Linear regression: E-cigarette initiation and change in smoking intensity between Wave 1 and Wave 2, PATH (2013-2015) (n=4,673)**

|                                                | Difference in average cig/day |                |         |
|------------------------------------------------|-------------------------------|----------------|---------|
|                                                | Coef.                         | 95% CI         | p-value |
| <b>Sex</b>                                     |                               |                |         |
| Male                                           | Ref                           | -              | -       |
| Female                                         | 0.19                          | (-0.28, 0.67)  | 0.423   |
| <b>Age</b>                                     |                               |                |         |
| 25 to 34 years                                 | Ref                           | -              | -       |
| 35 to 44 years                                 | 0.18                          | (-0.44, 0.79)  | 0.567   |
| 45 to 54 years                                 | 0.28                          | (-0.25, 0.80)  | 0.299   |
| 55 to 64 years                                 | 0.11                          | (-0.57, 0.79)  | 0.747   |
| 65 to 74 years                                 | 1.21                          | (0.16, 2.26)   | 0.024   |
| ≥ 75 years                                     | -0.12                         | (-1.31, 1.07)  | 0.842   |
| <b>Race/Ethnicity</b>                          |                               |                |         |
| Non-Hispanic White                             | Ref                           | -              | -       |
| Non-Hispanic Black                             | -1.94                         | (-2.72, -1.17) | <0.001  |
| Hispanic                                       | -0.80                         | (-1.55, -0.05) | 0.037   |
| Non-Hispanic Other                             | -0.16                         | (-1.20, 0.89)  | 0.769   |
| <b>Region</b>                                  |                               |                |         |
| Northeast                                      | Ref                           | -              | -       |
| Midwest                                        | -0.13                         | (-0.74, 0.47)  | 0.665   |
| South                                          | -0.11                         | (-0.82, 0.60)  | 0.766   |
| West                                           | -0.60                         | (-1.25, 0.05)  | 0.070   |
| <b>Household Income</b>                        |                               |                |         |
| Below poverty level                            | Ref                           | -              | -       |
| At or near poverty level                       | 0.11                          | (-0.50, 0.71)  | 0.724   |
| ≥ twice poverty level                          | -0.02                         | (-0.65, 0.61)  | 0.949   |
| <b>Education</b>                               |                               |                |         |
| Less than high school                          | Ref                           | -              | -       |
| High school or equivalent                      | -0.05                         | (-0.67, 0.57)  | 0.871   |
| Some college                                   | -0.21                         | (-0.89, 0.48)  | 0.556   |
| Bachelor's/advanced degree                     | -0.27                         | (-1.07, 0.52)  | 0.497   |
| <b>Lived in a smoking household as a child</b> |                               |                |         |
| No                                             | Ref                           | -              | -       |
| Yes                                            | 0.41                          | (-0.07, 0.89)  | 0.093   |
| <b>Currently lives with a cigarette smoker</b> |                               |                |         |
| No                                             | Ref                           | -              | -       |
| Yes                                            | -0.21                         | (-0.66, 0.24)  | 0.360   |
| <b>Frequency of cigarette use at Wave 1</b>    |                               |                |         |
| Some day cigarette smoker                      | Ref                           | -              | -       |



|                                                          |        |                 |        |
|----------------------------------------------------------|--------|-----------------|--------|
| Every day cigarette smoker                               | -1.69  | (-2.31, -1.08)  | <0.001 |
| Intensity of cigarette smoking at Wave 1                 |        |                 |        |
| <1 pack per day                                          | Ref    | -               | -      |
| 1-2 packs per day                                        | -3.48  | (-4.03, -2.92)  | <0.001 |
| ≥ 2 packs per day                                        | -11.56 | (-14.03, -9.09) | <0.001 |
| Time to first cigarette in morning                       |        |                 |        |
| ≤ 5 minutes                                              | Ref    | -               | -      |
| 5-30 minutes                                             | -0.61  | (-1.29, 0.07)   | 0.077  |
| 30-60 minutes                                            | -0.49  | (-2.04, 1.07)   | 0.538  |
| > 60 minutes                                             | -1.25  | (-2.04, -0.46)  | 0.002  |
| Tried to quit smoking cigarettes in year prior to Wave 1 |        |                 |        |
| No                                                       | Ref    | -               | -      |
| Yes                                                      | -0.54  | (-0.96, -0.11)  | 0.015  |
| New e-cigarette use at Wave 2                            |        |                 |        |
| Non-user                                                 | Ref    | -               | -      |
| Experimenter                                             | 0.07   | (-0.97, 1.11)   | 0.892  |
| Some day user                                            | 0.19   | (-0.87, 1.25)   | 0.721  |
| Every day user                                           | -5.60  | (-7.68, -3.52)  | <0.001 |
